# Supplementary material
Source: PubMed Central journal article supplement (PMC5472152)

**A**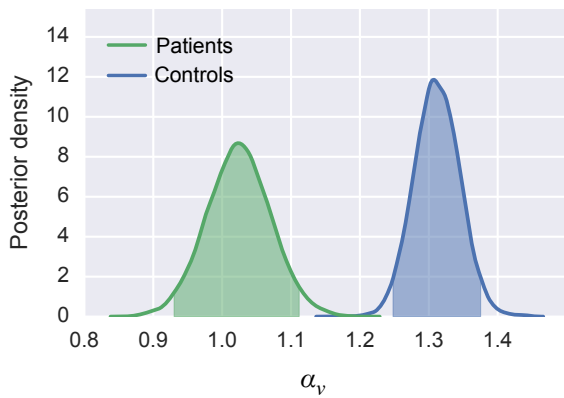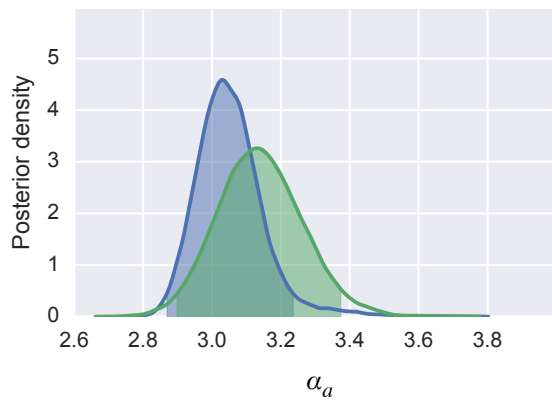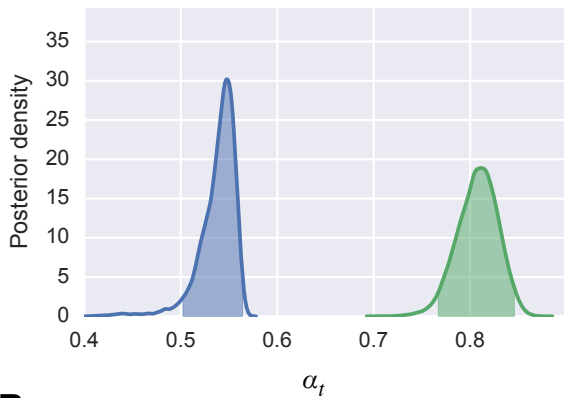**B**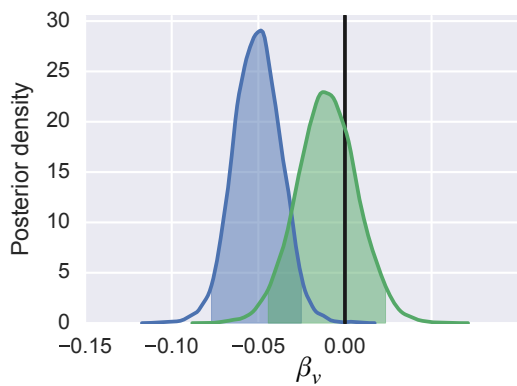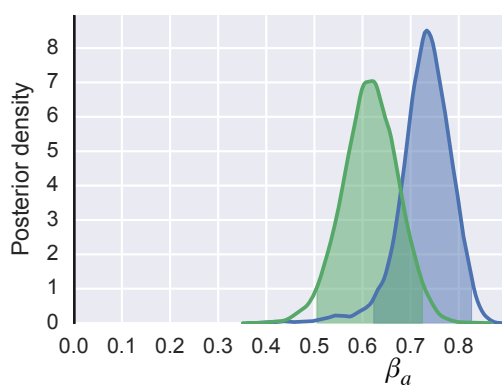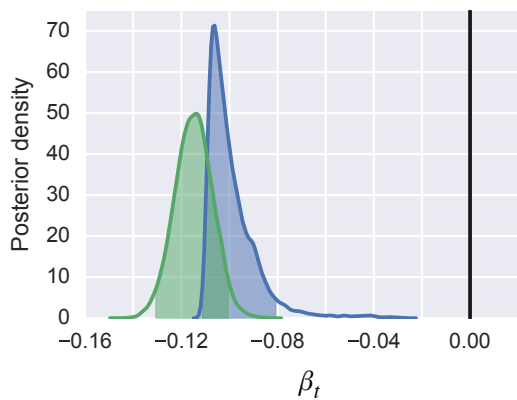

Supplement: sbw168_suppl_Supplementary_Material_2.pdf [file sbw168_suppl_Supplementary_Material_2.pdf]

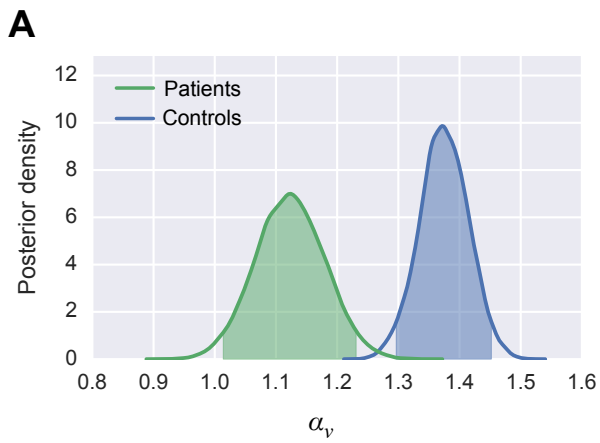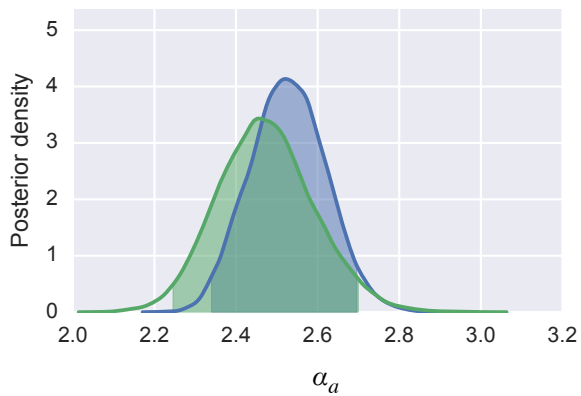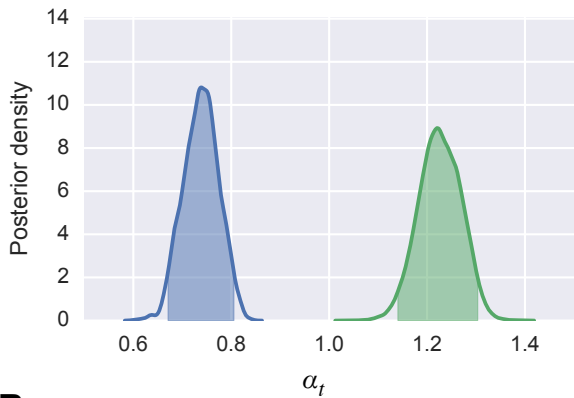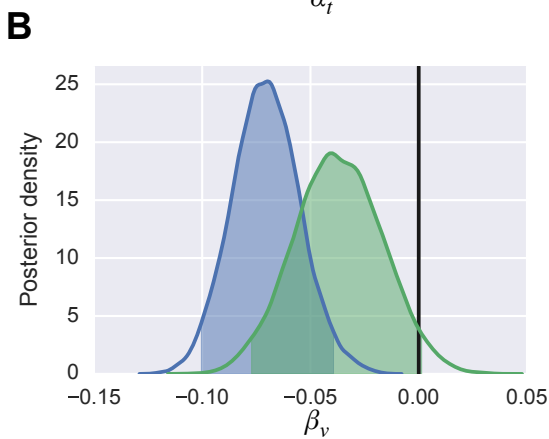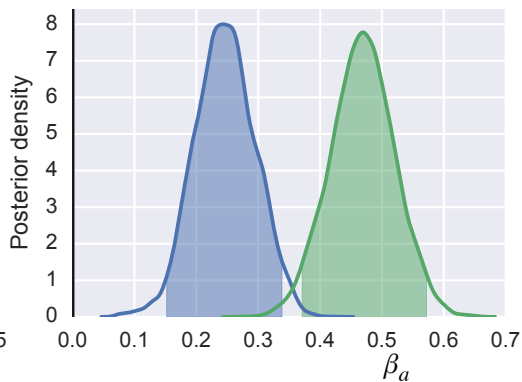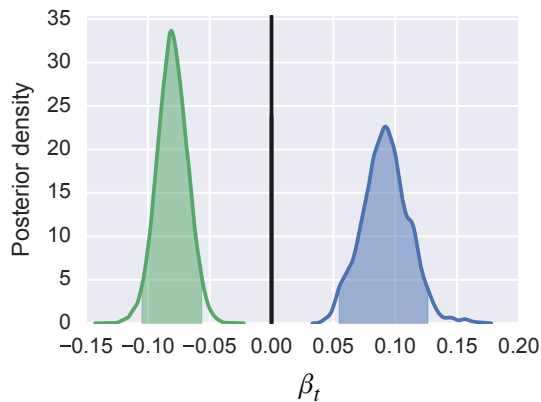

Supplement: sbw168_suppl_Supplementary_Material_3.pdf [file sbw168_suppl_Supplementary_Material_3.pdf]
